# Supplementary material
Source: publisher figshare collection journal article supplement (https://acs.figshare.com/ndownloader/files/4474837)
Supplement: Supplementary file 1 [file 4474837]

data_General
_audit_creation_date                  '2010-01-23'
_audit_creation_method                'by CrystalStructure 3.8'
_audit_update_record                   ?

#==============================================================================

# PROCESSING SUMMARY (IUCr Office Use Only)

_journal_date_recd_electronic     ?
_journal_date_from_coeditor       ?
_journal_date_accepted            ?
_journal_coeditor_code            ?

#==============================================================================

# SUBMISSION DETAILS

_publ_contact_author_name             'ENTER NAME'
_publ_contact_author_email            'ENTER EMAIL ADDRESS'
_publ_contact_author_fax              'ENTER FAX NUMBER'
_publ_contact_author_phone            'ENTER PHONE NUMBER'
_publ_contact_letter
;
    ENTER TEXT OF LETTER
;
_publ_requested_journal               test
_publ_requested_category              'CHOOSE FI FM FO CI CM CO or AD'
_publ_requested_coeditor_name          ?

#==============================================================================

# TITLE AND AUTHOR LIST

_publ_section_title
;
    ENTER SECTION TITLE
;
_publ_section_title_footnote
;
    ENTER FOOTNOTE TO TITLE OF PAPER
;
loop_
_publ_author_name
_publ_author_footnote
_publ_author_address
' FIRST AUTHORS NAME '
;
  FIRST AUTHORS FOOTNOTES
;
;
  FIRST AUTHORS ADDRESS
;
_publ_section_synopsis
;
  ENTER SYNOPSIS
;

#==============================================================================

# TEXT

_publ_section_abstract
;
    ENTER ABSTRACT
;
_publ_section_comment
;
    ENTER TEXT
;
_publ_section_references
;
    ENTER OTHER REFERENCES

    Johnson, C.K. (1976). ORTEP-II. A FORTRAN Thermal-Ellipsoid Plot
    Program. Report ORNL-5138. Oak Ridge National Laboratory, 
    Tennessee, USA.

    Rigaku (1998). PROCESS-AUTO. Automatic Data Acquisition and Processing
    Package for Imaging Plate Diffractometer. Rigaku Corporation, Tokyo
    196-8666, Japan

    Rigaku & RAC (2007). CrystalStructure (Version 3.80). Single Crystal
    Structure Analysis Software. Rigaku, Tokyo 196-8666, Japan. Rigaku
    Americas, TX, USA 77381-5209.
    
    Sheldrick, G.M. (1997). SHELXS97. Program for the Solution of Crystal
    Structures. University of Gottingen, Germany.

    Sheldrick, G.M. (1997). SHELXL97. University of Gottingen, Germany.

;
_publ_section_figure_captions
;
    ENTER FIGURE CAPTIONS
;
_publ_section_exptl_prep
;
    ENTER COMPOUND PREPARATION DETAILS
;
_publ_section_exptl_refinement
;
    ENTER SPECIAL DETAILS OF THE REFINEMENT
;

#==============================================================================

data__100118

#==============================================================================

# CHEMICAL DATA

_chemical_formula_sum                  'C23 H24 Br N O2 '
_chemical_formula_moiety               'C23 H24 Br N O2 '
_chemical_formula_weight               426.35
_chemical_melting_point                ?
_chemical_absolute_configuration       ad

#==============================================================================

# CRYSTAL DATA
_symmetry_cell_setting                 orthorhombic
_symmetry_space_group_name_H-M        'P 21 21 21'
_symmetry_space_group_name_Hall       'P 2ac 2ab'
_symmetry_Int_Tables_number            19
loop_
 _symmetry_equiv_pos_as_xyz 
 'x, y, z' 
 'x+1/2, -y+1/2, -z' 
 '-x, y+1/2, -z+1/2' 
 '-x+1/2, -y, z+1/2' 

#------------------------------------------------------------------------------

_cell_length_a                         5.91964(11)
_cell_length_b                         8.88008(16)
_cell_length_c                         37.613(3)
_cell_angle_alpha                      90.0000
_cell_angle_beta                       90.0000
_cell_angle_gamma                      90.0000
_cell_volume                           1977.19(15)
_cell_formula_units_Z                  4
_cell_measurement_reflns_used          21678
_cell_measurement_theta_min            4.7
_cell_measurement_theta_max            68.3
_cell_measurement_temperature          153.1

#------------------------------------------------------------------------------

_exptl_crystal_description            'needle'
_exptl_crystal_colour                 'colorless'
_exptl_crystal_size_max                0.20
_exptl_crystal_size_mid                0.05
_exptl_crystal_size_min                0.01
_exptl_crystal_density_diffrn          1.432
_exptl_crystal_density_meas            ?
_exptl_crystal_density_method         'not measured'
_exptl_crystal_F_000                   880.00
_exptl_absorpt_coefficient_mu          2.969
_exptl_absorpt_correction_type         multi-scan
_exptl_absorpt_process_details         
;
    Higashi, T. (1995). Program for Absorption Correction.
    Rigaku Corporation, Tokyo, Japan.
;
_exptl_absorpt_correction_T_min        0.643
_exptl_absorpt_correction_T_max        0.979

#==============================================================================

# EXPERIMENTAL DATA

_diffrn_radiation_type                'Cu K\a'
_diffrn_radiation_wavelength           1.54187
_diffrn_measurement_device_type       'Rigaku RAXIS-RAPID'
_diffrn_measurement_method             \w
_diffrn_detector_area_resol_mean       10.00
_diffrn_reflns_number                  21843
_diffrn_reflns_av_R_equivalents        0.027
_diffrn_reflns_theta_max               68.17
_diffrn_measured_fraction_theta_max    0.986
_diffrn_reflns_theta_full              68.17
_diffrn_measured_fraction_theta_full   0.986
_diffrn_ambient_temperature            153.1
_diffrn_reflns_limit_h_min             -6
_diffrn_reflns_limit_h_max             6
_diffrn_reflns_limit_k_min             -10
_diffrn_reflns_limit_k_max             10
_diffrn_reflns_limit_l_min             -45
_diffrn_reflns_limit_l_max             45

#==============================================================================

# REFINEMENT DATA

_refine_special_details
;
    Refinement was performed using all reflections. The weighted 
    R-factor (wR) and goodness of fit (S) are based on F^2^.
    R-factor (gt) are based on F. The threshold expression of
    F^2^ > 2.0 sigma(F^2^) is used only for calculating R-factor (gt).
;
_reflns_number_total                   3567
_reflns_number_gt                      3466
_reflns_threshold_expression           F^2^>2.0\s(F^2^)
_refine_ls_structure_factor_coef       Fsqd
_refine_ls_R_factor_gt                 0.0251
_refine_ls_wR_factor_ref               0.0617
_refine_ls_hydrogen_treatment          constr
_refine_ls_number_reflns               3567
_refine_ls_number_parameters           246
_refine_ls_goodness_of_fit_ref         1.049
_refine_ls_weighting_scheme            calc
_refine_ls_weighting_details
   'w = 1/[\s^2^(Fo^2^)+(0.0380P)^2^+0.3414P] where P=(Fo^2^+2Fc^2^)/3'
_refine_ls_shift/su_max                0.0020
_refine_diff_density_max               0.34
_refine_diff_density_min               -0.20
_refine_ls_extinction_method           none
_refine_ls_extinction_coef             ?
_refine_ls_abs_structure_details
   'Flack, H. D. (1983), Acta Cryst. A39, 876-881.  1458 Friedel Pairs'
_refine_ls_abs_structure_Flack         -0.018(13)

loop_
_atom_type_symbol
_atom_type_description
_atom_type_scat_dispersion_real
_atom_type_scat_dispersion_imag
_atom_type_scat_source
  'C' 'C'  0.018 0.009 
;
International Tables for Crystallography
(1992, Vol. C, Tables 4.2.6.8 and 6.1.1.4)
;
  'H' 'H'  0.000 0.000 
;
International Tables for Crystallography
(1992, Vol. C, Table 6.1.1.4)
;
  'Br' 'Br'  -0.676 1.280 
;
International Tables for Crystallography
(1992, Vol. C, Tables 4.2.6.8 and 6.1.1.4)
;
  'N' 'N'  0.031 0.018 
;
International Tables for Crystallography
(1992, Vol. C, Tables 4.2.6.8 and 6.1.1.4)
;
  'O' 'O'  0.049 0.032 
;
International Tables for Crystallography
(1992, Vol. C, Tables 4.2.6.8 and 6.1.1.4)
;

#==============================================================================

# ATOMIC COORDINATES AND THERMAL PARAMETERS

loop_
 _atom_site_label 
 _atom_site_type_symbol 
 _atom_site_fract_x 
 _atom_site_fract_y 
 _atom_site_fract_z 
 _atom_site_U_iso_or_equiv 
 _atom_site_adp_type 
 _atom_site_occupancy 
 _atom_site_symmetry_multiplicity 
 _atom_site_calc_flag 
 _atom_site_refinement_flags 
 _atom_site_disorder_assembly 
 _atom_site_disorder_group 
Br1 Br -0.14393(4) 0.77296(3) 0.320679(6) 0.04002(8) Uani 1 1 d . . . 
O1 O 0.5493(3) 0.42204(18) 0.43857(4) 0.0431(4) Uani 1 1 d . . . 
O2 O 0.8767(3) -0.16558(19) 0.44586(4) 0.0414(4) Uani 1 1 d . . . 
N1 N 0.5151(3) 0.2242(2) 0.40086(4) 0.0280(4) Uani 1 1 d . . . 
C1 C 0.5487(4) -0.0062(2) 0.43738(5) 0.0273(4) Uani 1 1 d . . . 
C2 C 0.6704(4) 0.1328(2) 0.42194(5) 0.0282(4) Uani 1 1 d . . . 
H2A H 0.7327 0.1942 0.4416 0.034 Uiso 1 1 calc R . . 
H2B H 0.7979 0.0995 0.4068 0.034 Uiso 1 1 calc R . . 
C3 C 0.3990(4) 0.1490(2) 0.37120(5) 0.0280(4) Uani 1 1 d . . . 
H3 H 0.2708 0.2159 0.3641 0.034 Uiso 1 1 calc R . . 
C4 C 0.2941(4) 0.0008(3) 0.38443(5) 0.0320(5) Uani 1 1 d . . . 
H4A H 0.1610 0.0246 0.3993 0.038 Uiso 1 1 calc R . . 
H4B H 0.2404 -0.0576 0.3637 0.038 Uiso 1 1 calc R . . 
C5 C 0.4565(4) -0.0969(2) 0.40590(5) 0.0319(5) Uani 1 1 d . . . 
H5A H 0.5829 -0.1303 0.3906 0.038 Uiso 1 1 calc R . . 
H5B H 0.3766 -0.1874 0.4147 0.038 Uiso 1 1 calc R . . 
C6 C 0.4707(4) 0.3672(2) 0.41146(5) 0.0294(4) Uani 1 1 d . . . 
C7 C 0.3167(4) 0.4597(2) 0.38828(5) 0.0291(5) Uani 1 1 d . . . 
C8 C 0.1086(4) 0.5049(2) 0.40138(5) 0.0330(5) Uani 1 1 d . . . 
H8 H 0.0617 0.4724 0.4243 0.040 Uiso 1 1 calc R . . 
C9 C -0.0313(4) 0.5966(2) 0.38149(5) 0.0333(5) Uani 1 1 d . . . 
H9 H -0.1746 0.6265 0.3904 0.040 Uiso 1 1 calc R . . 
C10 C 0.0415(4) 0.6439(2) 0.34838(5) 0.0314(5) Uani 1 1 d . . . 
C11 C 0.2502(4) 0.6042(3) 0.33534(6) 0.0359(5) Uani 1 1 d . . . 
H11 H 0.2995 0.6412 0.3129 0.043 Uiso 1 1 calc R . . 
C12 C 0.3874(4) 0.5100(2) 0.35503(5) 0.0347(5) Uani 1 1 d . . . 
H12 H 0.5299 0.4796 0.3459 0.042 Uiso 1 1 calc R . . 
C13 C 0.5514(4) 0.1331(2) 0.33844(5) 0.0286(4) Uani 1 1 d . . . 
C14 C 0.7598(4) 0.2042(3) 0.33564(6) 0.0334(5) Uani 1 1 d . . . 
H14 H 0.8173 0.2596 0.3553 0.040 Uiso 1 1 calc R . . 
C15 C 0.8856(4) 0.1951(3) 0.30431(6) 0.0394(5) Uani 1 1 d . . . 
H15 H 1.0272 0.2449 0.3025 0.047 Uiso 1 1 calc R . . 
C16 C 0.8025(4) 0.1128(3) 0.27579(6) 0.0402(6) Uani 1 1 d . . . 
H16 H 0.8896 0.1051 0.2547 0.048 Uiso 1 1 calc R . . 
C17 C 0.5958(4) 0.0421(2) 0.27765(5) 0.0384(6) Uani 1 1 d . . . 
C18 C 0.4709(4) 0.0529(2) 0.30917(5) 0.0329(5) Uani 1 1 d . . . 
H18 H 0.3282 0.0045 0.3107 0.039 Uiso 1 1 calc R . . 
C19 C 0.5005(6) -0.0458(3) 0.24706(7) 0.0565(7) Uani 1 1 d . . . 
H19A H 0.4212 0.0227 0.2309 0.068 Uiso 1 1 calc R . . 
H19B H 0.3944 -0.1215 0.2560 0.068 Uiso 1 1 calc R . . 
H19C H 0.6235 -0.0959 0.2343 0.068 Uiso 1 1 calc R . . 
C20 C 0.7240(4) -0.0945(2) 0.45878(5) 0.0320(5) Uani 1 1 d . . . 
C21 C 0.6777(4) -0.0747(3) 0.49814(5) 0.0436(6) Uani 1 1 d . . . 
H21A H 0.8176 -0.0470 0.5110 0.052 Uiso 1 1 calc R . . 
H21B H 0.6163 -0.1685 0.5086 0.052 Uiso 1 1 calc R . . 
C22 C 0.5041(5) 0.0524(3) 0.50017(6) 0.0454(6) Uani 1 1 d . . . 
H22A H 0.5795 0.1517 0.5018 0.054 Uiso 1 1 calc R . . 
H22B H 0.4035 0.0394 0.5210 0.054 Uiso 1 1 calc R . . 
C23 C 0.3712(4) 0.0384(3) 0.46530(5) 0.0362(5) Uani 1 1 d . . . 
H23A H 0.2991 0.1353 0.4590 0.043 Uiso 1 1 calc R . . 
H23B H 0.2528 -0.0399 0.4673 0.043 Uiso 1 1 calc R . . 
 
loop_ 
 _atom_site_aniso_label 
 _atom_site_aniso_U_11 
 _atom_site_aniso_U_22 
 _atom_site_aniso_U_33 
 _atom_site_aniso_U_23 
 _atom_site_aniso_U_13 
 _atom_site_aniso_U_12 
Br1 0.04199(14) 0.03461(12) 0.04346(12) 0.00507(9) -0.00845(10) 0.01010(10) 
O1 0.0527(11) 0.0376(9) 0.0390(8) -0.0095(7) -0.0165(8) 0.0109(8) 
O2 0.0385(10) 0.0412(8) 0.0446(8) -0.0007(7) -0.0036(7) 0.0118(8) 
N1 0.0266(9) 0.0283(8) 0.0291(8) -0.0014(7) -0.0049(6) 0.0051(8) 
C1 0.0245(11) 0.0296(11) 0.0279(9) -0.0007(8) -0.0002(8) -0.0002(9) 
C2 0.0239(11) 0.0303(10) 0.0303(9) -0.0005(7) -0.0037(8) 0.0041(9) 
C3 0.0251(11) 0.0302(10) 0.0288(9) -0.0033(8) -0.0047(8) 0.0068(9) 
C4 0.0268(13) 0.0386(12) 0.0305(10) -0.0045(8) -0.0003(8) -0.0029(9) 
C5 0.0352(12) 0.0328(11) 0.0277(10) -0.0005(8) 0.0007(9) -0.0027(10) 
C6 0.0284(12) 0.0316(11) 0.0283(10) -0.0007(8) 0.0005(8) 0.0055(9) 
C7 0.0329(14) 0.0251(10) 0.0293(9) -0.0046(7) -0.0030(9) 0.0051(9) 
C8 0.0359(13) 0.0361(11) 0.0271(9) 0.0000(8) 0.0019(9) 0.0042(10) 
C9 0.0291(12) 0.0360(12) 0.0347(10) -0.0038(9) 0.0017(9) 0.0079(10) 
C10 0.0333(12) 0.0249(10) 0.0359(11) -0.0011(8) -0.0090(9) 0.0075(9) 
C11 0.0402(13) 0.0346(12) 0.0330(10) 0.0052(9) 0.0031(9) 0.0067(11) 
C12 0.0312(13) 0.0371(11) 0.0358(10) 0.0016(8) 0.0032(9) 0.0098(10) 
C13 0.0295(11) 0.0258(10) 0.0305(10) 0.0027(8) -0.0031(8) 0.0094(9) 
C14 0.0334(12) 0.0314(11) 0.0355(10) 0.0009(9) -0.0008(9) 0.0046(10) 
C15 0.0365(13) 0.0386(12) 0.0430(11) 0.0099(9) 0.0049(10) 0.0050(11) 
C16 0.0503(16) 0.0382(12) 0.0320(10) 0.0076(9) 0.0073(10) 0.0119(11) 
C17 0.0548(17) 0.0320(11) 0.0284(10) 0.0026(8) -0.0013(10) 0.0092(11) 
C18 0.0377(13) 0.0294(10) 0.0316(10) 0.0021(8) -0.0045(9) 0.0063(10) 
C19 0.079(2) 0.0579(16) 0.0324(12) -0.0038(11) 0.0013(12) -0.0087(16) 
C20 0.0320(12) 0.0290(11) 0.0350(10) 0.0024(8) -0.0023(9) -0.0038(9) 
C21 0.0411(14) 0.0585(15) 0.0313(11) 0.0068(10) -0.0041(10) 0.0017(12) 
C22 0.0411(15) 0.0647(16) 0.0303(11) -0.0063(11) 0.0001(10) 0.0028(13) 
C23 0.0290(12) 0.0480(13) 0.0317(10) -0.0026(9) 0.0018(10) 0.0028(11) 

#==============================================================================

_computing_data_collection            'PROCESS-AUTO (Rigaku, 1998)'
_computing_cell_refinement            'PROCESS-AUTO (Rigaku, 1998)'
_computing_data_reduction         'CrystalStructure (Rigaku & RAC 2007)'
_computing_structure_solution         'SHELXS97 (Sheldrick, 1997)'
_computing_structure_refinement       'SHELXL97 (Sheldrick, 1997)' 
_computing_publication_material   'CrystalStructure (Rigaku & RAC 2007)'
_computing_molecular_graphics         'ORTEP (Johnson, 1976)'

#==============================================================================

# MOLECULAR GEOMETRY

_geom_special_details
;
    ENTER SPECIAL DETAILS OF THE MOLECULAR GEOMETRY
;

loop_
 _geom_bond_atom_site_label_1 
 _geom_bond_atom_site_label_2 
 _geom_bond_distance 
 _geom_bond_site_symmetry_2 
 _geom_bond_publ_flag 
Br1 C10 1.898(2) . ? 
O1 C6 1.222(2) . ? 
O2 C20 1.205(3) . ? 
N1 C6 1.356(3) . ? 
N1 C2 1.461(2) . ? 
N1 C3 1.471(2) . ? 
C1 C20 1.530(3) . ? 
C1 C5 1.532(3) . ? 
C1 C23 1.538(3) . ? 
C1 C2 1.543(3) . ? 
C3 C13 1.534(3) . ? 
C3 C4 1.538(3) . ? 
C4 C5 1.526(3) . ? 
C6 C7 1.506(3) . ? 
C7 C8 1.386(3) . ? 
C7 C12 1.392(3) . ? 
C8 C9 1.382(3) . ? 
C9 C10 1.383(3) . ? 
C10 C11 1.375(3) . ? 
C11 C12 1.382(3) . ? 
C13 C14 1.389(3) . ? 
C13 C18 1.395(3) . ? 
C14 C15 1.397(3) . ? 
C15 C16 1.388(3) . ? 
C16 C17 1.377(4) . ? 
C17 C18 1.400(3) . ? 
C17 C19 1.500(3) . ? 
C20 C21 1.516(3) . ? 
C21 C22 1.528(4) . ? 
C22 C23 1.534(3) . ? 
 
loop_ 
 _geom_angle_atom_site_label_1 
 _geom_angle_atom_site_label_2 
 _geom_angle_atom_site_label_3 
 _geom_angle 
 _geom_angle_site_symmetry_1 
 _geom_angle_site_symmetry_3 
 _geom_angle_publ_flag 
C6 N1 C2 118.87(17) . . ? 
C6 N1 C3 123.89(17) . . ? 
C2 N1 C3 116.95(16) . . ? 
C20 C1 C5 112.28(17) . . ? 
C20 C1 C23 103.66(16) . . ? 
C5 C1 C23 114.80(18) . . ? 
C20 C1 C2 106.95(17) . . ? 
C5 C1 C2 107.21(15) . . ? 
C23 C1 C2 111.73(17) . . ? 
N1 C2 C1 110.82(17) . . ? 
N1 C3 C13 112.11(17) . . ? 
N1 C3 C4 109.40(15) . . ? 
C13 C3 C4 114.76(17) . . ? 
C5 C4 C3 113.77(18) . . ? 
C4 C5 C1 109.56(18) . . ? 
O1 C6 N1 123.02(19) . . ? 
O1 C6 C7 119.73(19) . . ? 
N1 C6 C7 117.25(17) . . ? 
C8 C7 C12 119.6(2) . . ? 
C8 C7 C6 119.35(18) . . ? 
C12 C7 C6 120.9(2) . . ? 
C9 C8 C7 120.70(19) . . ? 
C8 C9 C10 118.7(2) . . ? 
C11 C10 C9 121.5(2) . . ? 
C11 C10 Br1 118.58(16) . . ? 
C9 C10 Br1 119.84(17) . . ? 
C10 C11 C12 119.5(2) . . ? 
C11 C12 C7 119.9(2) . . ? 
C14 C13 C18 118.4(2) . . ? 
C14 C13 C3 122.76(18) . . ? 
C18 C13 C3 118.7(2) . . ? 
C13 C14 C15 120.7(2) . . ? 
C16 C15 C14 119.6(2) . . ? 
C17 C16 C15 121.1(2) . . ? 
C16 C17 C18 118.7(2) . . ? 
C16 C17 C19 122.2(2) . . ? 
C18 C17 C19 119.1(2) . . ? 
C13 C18 C17 121.5(2) . . ? 
O2 C20 C21 126.2(2) . . ? 
O2 C20 C1 124.40(19) . . ? 
C21 C20 C1 109.38(19) . . ? 
C20 C21 C22 104.84(18) . . ? 
C21 C22 C23 104.02(19) . . ? 
C22 C23 C1 104.73(18) . . ? 

#===END========================================================================
